# Supplementary material
Source: Springer Nature journal article supplement (https://www.springermedizin.de/resource/supplementary/12943_2010_816_MOESM1_ESM.pdf/9554900)

**A.**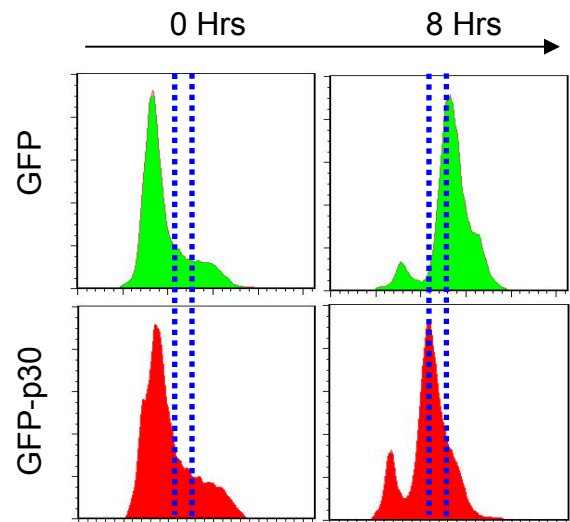

After HU release

**B.**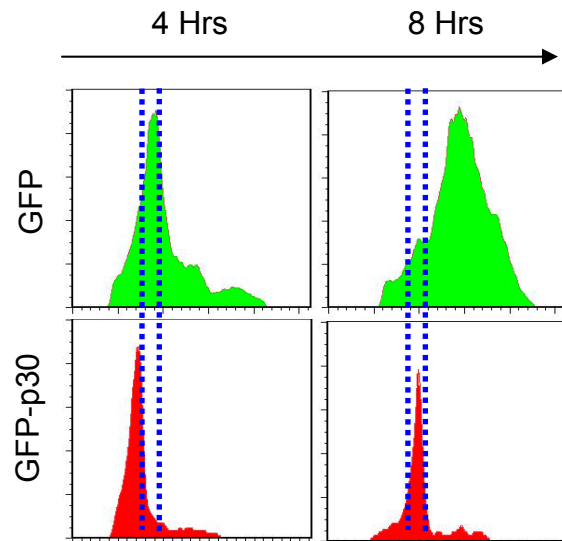

After HU release + Nocodazole

**C.**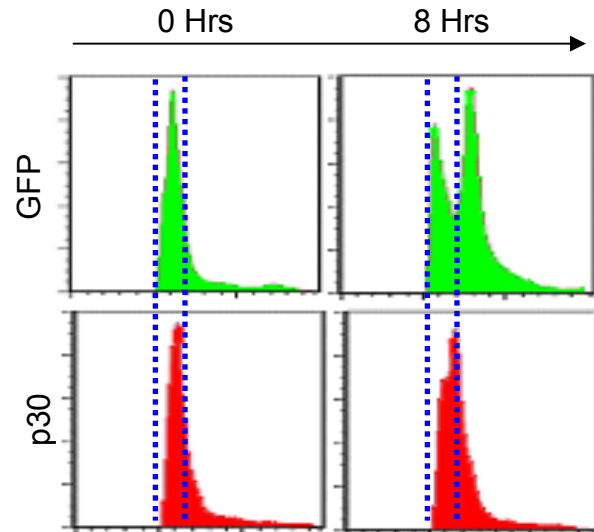

After HU release

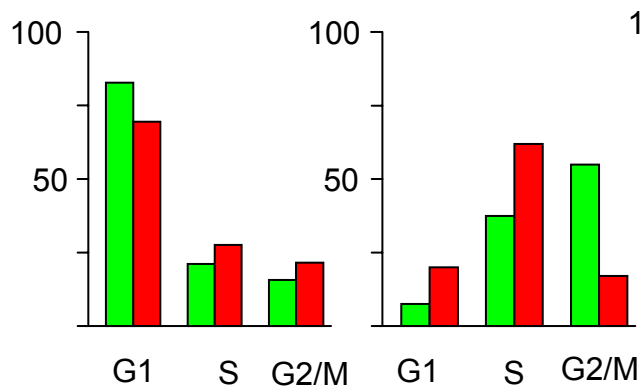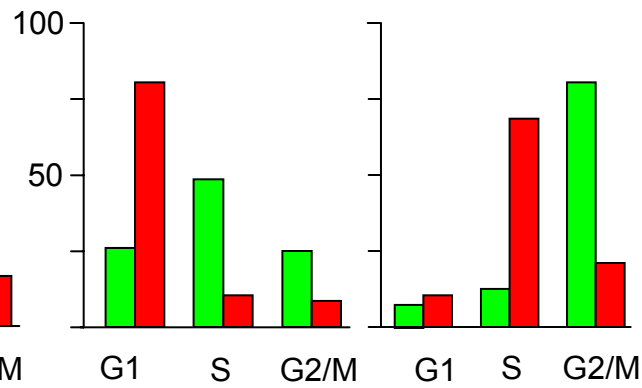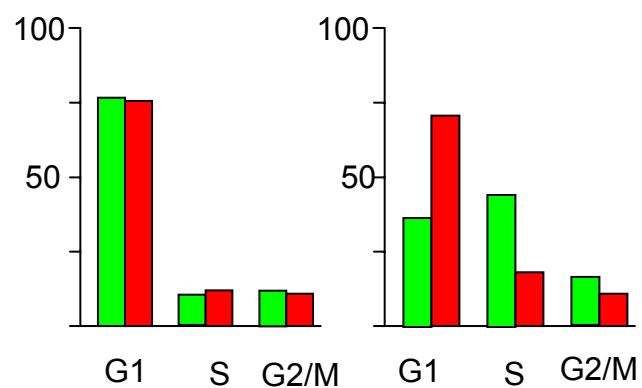

Supplement: MOESM1 [file 9554900]
